# Supplementary material
Source: ML conference proceedings conference paper supplement (https://proceedings.neurips.cc/paper_files/paper/2020/hash/1959eb9d5a0f7ebc58ebde81d5df400d-Abstract.html)
Supplement: Supplementary file [file 1959eb9d5a0f7ebc58ebde81d5df400d-Supplemental.zip]

## 5 Appendix

### 5.1 Details of the proof of Theorem 3.4

In the first part of the proof of Theorem 3.4 we established that

$$c_2 \|\beta_n - \hat{\alpha}_n\|^\nu \leq 2c_1 \frac{\log n}{\sqrt{n}} + \lambda_n C \|\beta_n - \hat{\alpha}_n\|.$$

Using Young's inequality, we have

$$\begin{aligned} \lambda_n C \|\beta_n - \hat{\alpha}_n\| &\leq \frac{1}{\nu} \left( \frac{(c_2 \nu)^{1/\nu}}{2} \|\beta_n - \hat{\alpha}_n\| \right)^\nu + \frac{\nu-1}{\nu} \left( \frac{2C}{(c_2 \nu)^{1/\nu}} \lambda_n \right)^{\nu/(\nu-1)} \\ &= \frac{c_2}{2} \|\beta_n - \hat{\alpha}_n\|^\nu + \frac{2(\nu-1)C^{\nu/(\nu-1)}}{\nu(c_2 \nu)^{1/(\nu-1)}} \lambda_n^{\nu/(\nu-1)}. \end{aligned}$$

Combining the two estimates, we have

$$\frac{c_2}{2} \|\beta_n - \hat{\alpha}_n\|^\nu \leq 2c_1 \frac{\log n}{\sqrt{n}} + \frac{2(\nu-1)C^{\nu/(\nu-1)}}{\nu(c_2 \nu)^{1/(\nu-1)}} \lambda_n^{\nu/(\nu-1)}.$$

### 5.2 Proof of Corollary 3.5

We note that  $\phi(\beta_n) \in \mathcal{K}$ . Thus,

$$\begin{aligned} \min_{\alpha \in \mathcal{K}} \|\hat{\alpha}_n - \alpha\| &\leq \|\hat{\alpha}_n - \phi(\beta_n)\| \leq \|\hat{\alpha}_n - \beta_n\| + \|\beta_n - \phi(\beta_n)\| \\ &\leq \|\hat{\alpha}_n - \beta_n\| + \|v_{\beta_n}\| \\ &\leq \|\hat{\alpha}_n - \beta_n\| + \|\hat{v}_n\| + C \|\hat{\alpha}_n - \beta_n\| \end{aligned}$$

and the bound can be obtained using the results of Theorem 3.4.

### 5.3 Probabilistic Lipschitzness of the empirical risk

Since both  $\mathcal{W}$  and  $\mathcal{X}$  are bounded and  $f_\alpha$  is analytic, there exist  $C_1, C_2 > 0$  such that

$$|\nabla_\alpha f_\alpha(x)| \leq C_1 \quad \text{and} \quad |f_\alpha(x)| \leq C_2 \quad \forall \alpha \in \mathcal{W}, x \in \mathcal{X}.$$

Therefore,

$$\begin{aligned} |R(\alpha) - R(\beta)| &= |\mathbb{E}[(Y - f_\alpha(X))^2 - (Y - f_\beta(X))^2]| \\ &\leq \mathbb{E}|(f_\alpha(X) - f_\beta(X))(2Y - f_\alpha(X) - f_\beta(X))| \\ &\leq C_1 \|\alpha - \beta\| \cdot \mathbb{E}|2Y - f_\alpha(X) - f_\beta(X)| \\ &\leq C_1 \|\alpha - \beta\| \cdot (2\mathbb{E}|Y - f_{\alpha^*}(X)| + \mathbb{E}|f_\alpha(X) + f_\beta(X) - 2f_{\alpha^*}(X)|) \\ &\leq C_1 \|\alpha - \beta\| (2\sigma + 4C_2). \end{aligned}$$

Similarly,

$$\begin{aligned} |R_n(\alpha) - R_n(\beta)| &\leq C_1 \|\alpha - \beta\| \left( 4C_2 + \frac{2}{n} \sum_{i=1}^n |Y_i - f_{\alpha^*}(X_i)| \right) \\ &= C_1 \|\alpha - \beta\| \left( 4C_2 + \frac{2}{n} \sum_{i=1}^n |\epsilon_i| \right). \end{aligned}$$

Thus, for all  $M_\delta > 4C_1 C_2$ ,

$$\begin{aligned} P[|R_n(\alpha) - R_n(\beta)| \leq M_\delta \|\alpha - \beta\| \quad \forall \alpha, \beta \in \mathcal{W}] \\ &\leq P\left(\frac{1}{n} \sum_{i=1}^n |\epsilon_i| \leq \frac{M_\delta}{2C_1} - 2C_2\right) \\ &= 1 - P\left(\frac{1}{n} \sum_{i=1}^n |\epsilon_i| \geq \frac{M_\delta}{2C_1} - 2C_2\right) \\ &\leq 1 - \frac{E|\epsilon_1|}{\frac{M_\delta}{2C_1} - 2C_2}. \end{aligned}$$

### 389 5.4 Proof of Lemma 3.3

390 The proof of this Lemma is similar to that of Lemma 4.2 in [Dinh and Ho \[2020\]](#). Since the network of  
 391 our framework is fixed, a standard generalization bound (with constants depending on the dimension  
 392 of the weight space  $\mathcal{W}$ ) can be obtained. For completeness, we include the proof of Lemma 4.2 in  
 393 [Dinh and Ho \[2020\]](#) below.

394 Note that  $nR_n(\alpha)/\sigma_e^2$  follows a non-central chi-squared distribution with  $n$  degrees of freedom and  
 395  $f_\alpha(X)$  is bounded. By applying Theorem 7 in Zhang and Zhou (2018)<sup>2</sup>, we have

$$\begin{aligned} & \mathbb{P}[|R_n(\alpha) - R(\alpha)| > t/2] \\ & \leq 2 \exp\left(-\frac{C_1 n^2 t^2}{n + 2 \sum_{i=1}^n [f_\alpha(X) - f_{\alpha^*}(X)]^2}\right) \\ & \leq 2 \exp(-C_2 n t^2), \end{aligned}$$

396 for all

$$0 < t < \frac{n + \sum_{i=1}^n [f_\alpha(X) - f_{\alpha^*}(X)]^2}{n}.$$

397 We define the events

$$\mathcal{A}(\alpha, t) = \{|R_n(\alpha) - R(\alpha)| > t/2\},$$

398

$$\begin{aligned} \mathcal{B}(\alpha, t) = \{ & \exists \alpha' \in \mathcal{W} \text{ such that} \\ & \|\alpha' - \alpha\| \leq \frac{t}{4M_\delta} \text{ and } |R_n(\alpha') - R(\alpha')| > t\}, \end{aligned}$$

399 and

$$\mathcal{C} = \{|R_n(\alpha) - R_n(\alpha')| \leq M_\delta \|\alpha - \alpha'\|, \forall \alpha, \alpha' \in \mathcal{W}\}.$$

400 Here,  $M_\delta$  is defined in Lemma 3.5. By Lemma 3.5,  $\mathcal{B}(\alpha, t) \cap \mathcal{C} \subset \mathcal{A}(\alpha, t)$  and  $P(\mathcal{C}) \geq 1 - \delta$ .

401 Let  $m = \dim(\mathcal{W})$ , there exist  $C_3(m) \geq 1$  and a finite set  $\mathcal{H} \subset \mathcal{W}$  such that

$$\mathcal{W} \subset \bigcup_{\alpha \in \mathcal{H}} \mathcal{V}(\alpha, \epsilon) \quad \text{and} \quad |\mathcal{H}| \leq C_3/\epsilon^m$$

402 where  $\epsilon = t/(4M_\delta)$ ,  $\mathcal{V}(\alpha, \epsilon)$  denotes the open ball centered at  $\alpha$  with radius  $\epsilon$ , and  $|\mathcal{H}|$  denotes the  
 403 cardinality of  $\mathcal{H}$ . By a union bound, we have

$$\mathbb{P}[\exists \alpha \in \mathcal{H} : |R_n(\alpha) - R(\alpha)| > t/2] \leq 2 \frac{C_3(4M_\delta)^m}{t^m} e^{-C_2 n t^2}.$$

404 Using the fact that  $\mathcal{B}(\alpha, t) \cap \mathcal{C} \subset \mathcal{A}(\alpha, t)$ ,  $\forall \alpha \in \mathcal{H}$ , we deduce

$$\mathbb{P}[\{\exists \alpha \in \mathcal{W} : |R_n(\alpha) - R(\alpha)| > t\} \cap \mathcal{C}] \leq C_4 t^{-m} e^{-C_2 n t^2}.$$

405 Hence,

$$\mathbb{P}[\{\exists \alpha \in \mathcal{W} : |R_n(\alpha) - R(\alpha)| > t\}] \leq C_4 t^{-m} e^{-C_2 n t^2} + \delta.$$

406 To complete the proof, we chose  $t$  in such a way that  $C_4 t^{-m} e^{-C_2 n t^2} \leq \delta$ . This can be done by  
 407 choosing  $t = \mathcal{O}(\log n / \sqrt{n})$ .

<sup>2</sup>Zhang, Anru and Yuchen Zhou. "On the non-asymptotic and sharp lower tail bounds of random variables." arXiv preprint arXiv:1810.09006 (2018).
